# Supplementary material
Source: PubMed Central journal article supplement (PMC4076126)
Supplement: 10.3163.1536-5050.102.3.007.sg001.pdf [file 10.3163.1536-5050.102.3.007.sg001.pdf]

## Searching ClinicalTrials.gov and the International Clinical Trials Registry Platform to inform systematic reviews: what are the optimal search approaches?

Julie M. Glanville, MSc; Steven Duffy, PgDip; Rachael McCool, BSc; Danielle Varley, MSc

### APPENDIX

#### Full search strategies tested in ClinicalTrials.gov and the International Clinical Trials Registry Platform

Notes: International Clinical Trials Registry Platform (ICTRP): Truncation is permitted in the standard search, but not in the advanced search. The advanced search automatically looks for trial records containing synonyms of search words or phrases. Synonyms are generated using the Unified Medical Language System (UMLS) metathesaurus.

#### Henry [9]

Searches conducted in ClinicalTrials.gov and ICTRP

| Search strategy type     | Search strategy in ClinicalTrials.gov                                                                                                        | ClinicalTrials.gov results | ICTRP search strategy                                                                                                                        | ICTRP results                             |
|--------------------------|----------------------------------------------------------------------------------------------------------------------------------------------|----------------------------|----------------------------------------------------------------------------------------------------------------------------------------------|-------------------------------------------|
| Original Search Strategy | (antifibrinolytics OR aprotinin OR tranexamic acid OR aminocaproic acids)<br>AND<br>RCT filter                                               |                            | (antifibrinolytics OR aprotinin OR tranexamic acid OR aminocaproic acids)<br>AND<br>RCT filter                                               |                                           |
| Highly precise strategy  | The search topic did not lend itself to a strategy with 2 concepts                                                                           | N/A                        | The search topic did not lend itself to a strategy with 2 concepts                                                                           | N/A                                       |
| Precise strategy         | Basic interface:<br>(anti-fibrinolytic OR antifibrinolytic)<br>Advanced interface:<br>Interventions: (anti-fibrinolytic OR antifibrinolytic) | 158 (4)<br>149 (4)         | Standard interface:<br>anti-fibrinolytic* OR antifibrinolytic*<br>Advanced interface:<br>Intervention: anti-fibrinolytic OR antifibrinolytic | 13 for 9 trials (1)<br>4 for 4 trials (0) |
| Sensitive strategy       | The search topic did not lend itself to a strategy with 2 concepts                                                                           | N/A                        | The search topic did not lend itself to a strategy with 2 concepts                                                                           | N/A                                       |

| <b>Search strategy type</b> | <b>Search strategy in ClinicalTrials.gov</b>                                                                                                                                                     | <b>ClinicalTrials.gov results</b> | <b>ICTRP search strategy</b>                                                                                                                                                                  | <b>ICTRP results</b>   |
|-----------------------------|--------------------------------------------------------------------------------------------------------------------------------------------------------------------------------------------------|-----------------------------------|-----------------------------------------------------------------------------------------------------------------------------------------------------------------------------------------------|------------------------|
| Highly sensitive strategy   | Basic interface:<br>(anti-fibrinolytic OR antifibrinolytic OR antifibrinolysin OR anti-fibrinolysin OR antiplasmin OR anti-plasmin OR aprotinin OR tranexamic OR aminocaproic)                   | 176 (4)                           | Standard interface:<br>anti-fibrinolytic* OR antifibrinolytic* OR antifibrinolysin* OR anti-fibrinolysin* OR antiplasmin* OR anti-plasmin* OR aprotinin OR tranexamic OR aminocaproic         | 128 for 122 trials (8) |
|                             | Advanced interface:<br>Interventions: (anti-fibrinolytic OR antifibrinolytic OR antifibrinolysin OR anti-fibrinolysin OR antiplasmin OR anti-plasmin OR aprotinin OR tranexamic OR aminocaproic) | 165 (4)                           | Advanced interface:<br>Intervention: anti-fibrinolytic OR antifibrinolytic OR antifibrinolysin OR anti-fibrinolysin OR antiplasmin OR anti-plasmin OR aprotinin OR tranexamic OR aminocaproic | 106 for 100 trials (8) |

**Henry [10]**

Searches conducted in ClinicalTrials.gov and ICTRP

| <b>Search strategy type</b> | <b>Search strategy in ClinicalTrials.gov</b>                                                                                                                                                                                                            | <b>ClinicalTrials.gov results</b> | <b>ICTRP search strategy</b>                                                                                                                                                                                                            | <b>ICTRP results</b>                             |
|-----------------------------|---------------------------------------------------------------------------------------------------------------------------------------------------------------------------------------------------------------------------------------------------------|-----------------------------------|-----------------------------------------------------------------------------------------------------------------------------------------------------------------------------------------------------------------------------------------|--------------------------------------------------|
| Original search strategy    | (autologous blood transfusion OR autologous blood donation OR pre-operative autologous donation OR pre-operative autologous donation) AND (transfusion OR anaesthesia OR haemorrhage OR blood loss search strategy OR bleed OR bleeding) AND RCT filter |                                   | (autologous blood transfusion OR autologous blood donation OR pre-operative autologous donation OR pre-operative autologous donation) AND (transfusion OR anaesthesia OR haemorrhage OR blood loss OR bleed OR bleeding) AND RCT filter |                                                  |
| Highly precise strategy     | The search topic is already a compound of "autologous" and "blood."<br><br>Basic interface: "autologous blood"<br>Advanced interface: Interventions: "autologous blood"                                                                                 | 43 (0)<br><br>36 (0)              | The search topic is already a compound of "autologous" and "blood."<br><br>Standard interface: autologous blood<br>Advanced interface: Intervention: autologous blood                                                                   | 33 for 32 trials (1)<br><br>33 for 32 trials (1) |
| Precise strategy            | Reducing the strategy to 1 concept did not seem sensible. "Blood" would be very imprecise and too sensitive, and "autologous" was likely to be similar to the highly precise strategy because of its connection to "blood"                              | N/A                               | Reducing the strategy to 1 concept did not seem sensible. "Blood" would be very imprecise and too sensitive, and "autologous" was likely to be similar to the highly precise strategy because of its connection to "blood"              | N/A                                              |
| Sensitive strategy          | Basic interface: "autologous blood" OR "autologous donation" OR "pre-operative autologous" OR "preoperative autologous" OR "autologous predonation"                                                                                                     | 45 (0)                            | Standard interface: autologous blood OR autologous donation OR pre-operative autologous OR preoperative autologous                                                                                                                      | 34 for 33 trials (1)                             |

| <b>Search strategy type</b> | <b>Search strategy in ClinicalTrials.gov</b>                                                                                                                                | <b>ClinicalTrials.gov results</b> | <b>ICTRP search strategy</b>                                                                                                                                                                                                                                                                                                                                                                                                             | <b>ICTRP results</b>   |
|-----------------------------|-----------------------------------------------------------------------------------------------------------------------------------------------------------------------------|-----------------------------------|------------------------------------------------------------------------------------------------------------------------------------------------------------------------------------------------------------------------------------------------------------------------------------------------------------------------------------------------------------------------------------------------------------------------------------------|------------------------|
|                             | Advanced interface:<br>Conditions: transfusion OR hemorrhage OR "blood loss" OR bleed<br>Interventions: autologous AND (blood OR donation OR pre-operative OR preoperative) | 27(1)                             | Advanced interface:<br>Condition: transfusion OR hemorrhage OR blood loss OR bleed<br>Intervention: autologous blood OR autologous donation OR pre-operative autologous OR preoperative autologous                                                                                                                                                                                                                                       | 2 for 2 trials<br>(0)  |
| Highly sensitive strategy   | Basic interface:<br>(autologous AND (blood OR donation OR pre-operative OR preoperative)) AND (transfusion OR hemorrhage OR "blood loss" OR bleed)                          | 83 (1)                            | Standard interface:<br>autologous AND blood AND transfusion OR autologous AND donation AND transfusion OR pre-operative AND autologous AND transfusion OR preoperative AND autologous AND transfusion OR autologous AND blood AND hemorrhage OR autologous AND donation AND hemorrhage OR pre-operative AND autologous AND hemorrhage OR preoperative AND autologous AND hemorrhage OR autologous AND blood loss OR autologous AND bleed | 38 for 34 trials (0)   |
|                             | Advanced interface:<br>Interventions: "autologous blood" OR "autologous donation" OR "pre-operative autologous" OR "preoperative autologous" OR "autologous predonation"    | 37 (0)                            | Advanced interface:<br>Intervention: autologous blood OR autologous donation OR pre-operative autologous OR preoperative autologous                                                                                                                                                                                                                                                                                                      | 164 for 150 trials (1) |

**Albaramki [11]**

Searches in ClinicalTrials.gov and ICTRP

| <b>Search strategy type</b> | <b>Search strategy in ClinicalTrials.gov</b>                                                                                                                                                                                                                                                                                                                                                                                                                                                                                                                   | <b>ClinicalTrials.gov results</b>         | <b>ICTRP Search strategy</b>                                                                                                                                                                                                                                                                                                                                                                                                                                                                                                                                                                                                   | <b>ICTRP results</b>                                                     |
|-----------------------------|----------------------------------------------------------------------------------------------------------------------------------------------------------------------------------------------------------------------------------------------------------------------------------------------------------------------------------------------------------------------------------------------------------------------------------------------------------------------------------------------------------------------------------------------------------------|-------------------------------------------|--------------------------------------------------------------------------------------------------------------------------------------------------------------------------------------------------------------------------------------------------------------------------------------------------------------------------------------------------------------------------------------------------------------------------------------------------------------------------------------------------------------------------------------------------------------------------------------------------------------------------------|--------------------------------------------------------------------------|
| Original search strategy    | (iron OR ferric/ferrous compounds) AND (renal replacement OR haemodialysis OR kidney failure OR chronic kidney OR end-stage renal OR uremia) NOTE1                                                                                                                                                                                                                                                                                                                                                                                                             |                                           | (iron OR ferric/ferrous compounds) AND (renal replacement OR haemodialysis OR kidney failure OR chronic kidney OR end-stage renal OR uremia)                                                                                                                                                                                                                                                                                                                                                                                                                                                                                   |                                                                          |
| Highly precise strategy     | Basic interface:<br>iron AND kidney<br>Advanced interface:<br>Conditions: kidney<br>Interventions: iron                                                                                                                                                                                                                                                                                                                                                                                                                                                        | 146 (4+2 ongoing)<br><br>60 (4+2 ongoing) | Standard interface:<br>iron AND kidney<br>Advanced interface:<br>Condition: kidney<br>Intervention: iron                                                                                                                                                                                                                                                                                                                                                                                                                                                                                                                       | 255 for 180 trials (5)<br>68 records for 56 trials (1)                   |
| Precise strategy            | No strategy was tested because it was difficult to search efficiently for 1 concept only (i.e., iron or kidney)                                                                                                                                                                                                                                                                                                                                                                                                                                                | N/A                                       | No strategy was tested because it was difficult to search efficiently for 1 concept only (i.e., iron or kidney)                                                                                                                                                                                                                                                                                                                                                                                                                                                                                                                | N/A                                                                      |
| Sensitive strategy          | Basic interface:<br>(ferric OR ferrous OR iron) AND (renal replacement OR dialysis OR hemodialysis OR haemodialysis OR kidney failure OR uremia OR end stage renal OR end stage kidney OR chronic kidney OR chronic renal)<br><br>Advanced:<br>Conditions: renal replacement OR dialysis OR hemodialysis OR haemodialysis OR kidney failure OR uremia OR end stage renal OR end stage kidney OR chronic kidney OR chronic renal<br>Interventions: ferric compounds OR ferrous compounds OR ferric gluconate OR ferrous gluconate OR ferrosferric oxide OR iron | 138 (5+2 ongoing)<br><br>38 (5+2 ongoing) | Standard interface:<br>ferric compound* OR ferrous compound* OR ferric gluconat* OR ferrous gluconat* OR ferrosferric oxid* OR iron gluconat* OR iron supplement* OR iron replacement* OR iron fumarate* OR iron dextran* OR iron sucrose* OR iron saccharate<br>Advanced:<br>Condition: renal replacement OR dialysis OR hemodialysis OR haemodialysis OR kidney failure OR uremia OR end stage renal OR end stage kidney OR chronic kidney OR chronic renal<br>Intervention: ferric compound OR ferrous compound OR ferric gluconate OR ferrous gluconate OR ferrosferric oxide OR iron gluconate OR iron supplement OR iron | 192 for 116 trials (6+0 ongoing)<br><br>162 for 141 trials (2+1 ongoing) |

| Search strategy type      | Search strategy in ClinicalTrials.gov                                                                                                                                                    | ClinicalTrials.gov results | ICTRP Search strategy                                                                                                                                                                                                                                                                                                                                                                                                                                                                                                                                                                                                                                                                                                                                                                                                                                                          | ICTRP results                        |
|---------------------------|------------------------------------------------------------------------------------------------------------------------------------------------------------------------------------------|----------------------------|--------------------------------------------------------------------------------------------------------------------------------------------------------------------------------------------------------------------------------------------------------------------------------------------------------------------------------------------------------------------------------------------------------------------------------------------------------------------------------------------------------------------------------------------------------------------------------------------------------------------------------------------------------------------------------------------------------------------------------------------------------------------------------------------------------------------------------------------------------------------------------|--------------------------------------|
|                           | gluconate OR iron supplement OR iron replacement                                                                                                                                         |                            | replacement OR iron fumarate OR iron dextran OR iron sucrose OR iron saccharate                                                                                                                                                                                                                                                                                                                                                                                                                                                                                                                                                                                                                                                                                                                                                                                                |                                      |
| Highly sensitive strategy | Basic interface:<br>(ferric compound OR ferric gluconate OR ferrousferrous oxide OR iron gluconate OR iron supplement OR iron replacement OR ferumoxytol OR magnetite)                   | 330(5+2 ongoing)           | Standard interface:<br>ferric AND renal replacement* OR ferric AND dialysis OR ferric AND hemodialysis OR ferric AND haemodialysis OR Ferric AND kidney failure OR ferric AND uremia OR ferric AND end stage renal OR ferric AND end stage kidney OR ferric AND chronic kidney OR ferric AND chronic renal OR ferrous AND renal replacement* OR ferrous AND dialysis OR ferrous AND hemodialysis OR ferrous AND haemodialysis OR ferrous AND kidney failure OR ferrous AND uremia OR ferrous AND end stage renal OR ferrous AND end stage kidney OR ferrous AND chronic kidney OR ferrous AND chronic renal OR iron AND renal replacement* OR iron AND dialysis OR iron AND hemodialysis OR iron AND haemodialysis OR iron AND kidney failure OR iron AND uremia OR iron AND end stage renal OR iron AND end stage kidney OR iron AND chronic kidney OR iron AND chronic renal | 208 for 135 trials (6+1 ongoing)     |
|                           | Advanced interface:<br>Interventions: (ferric compound OR ferric gluconate OR ferrousferrous oxide OR iron gluconate OR iron supplement OR iron replacement OR ferumoxytol OR magnetite) | 259 (5+2 ongoing)          | Advanced interface:<br>Intervention: ferric compound OR ferrous compound OR ferric gluconate OR ferrous gluconate OR ferrousferrous oxide OR iron gluconate OR iron supplement OR iron replacement OR iron fumarate OR iron dextran OR iron sucrose OR iron saccharate                                                                                                                                                                                                                                                                                                                                                                                                                                                                                                                                                                                                         | 1,345 for 1,277 trials<br><br>NOTE 2 |

NOTE 1: A longer search strategy (as used in the advanced search option) did not work in the basic search option.

NOTE 2: This search retrieved 1,345 records for 1,277 trials. Searching for "iron" in the "Intervention" field only found 850 records (for 799 trials). Using the strategy in the "Title" field instead found 120 records for 113 trials (finding 4 of the 6 included studies). The Help instructions indicate that it is possible to search for phrases, but it would appear that this option was not working correctly at the time the searches were undertaken.

**Derry [12]**

Searches in ClinicalTrials.gov and ICTRP\*

| <b>Search strategy type</b> | <b>Search strategy in ClinicalTrials.gov</b>                                                                               | <b>ClinicalTrials.gov results</b> | <b>ICTRP Search strategy</b>                                                                                                                                         | <b>ICTRP results</b>     |
|-----------------------------|----------------------------------------------------------------------------------------------------------------------------|-----------------------------------|----------------------------------------------------------------------------------------------------------------------------------------------------------------------|--------------------------|
| Original search strategy    | (subcutaneous injections/sterile water) AND (labour pain/labour analgesics)                                                |                                   | (subcutaneous injections/sterile water) AND (labour pain/labour analgesics)                                                                                          |                          |
| Highly precise strategy     | Basic interface:<br>water AND labor pain                                                                                   | 23                                | Standard search interface:<br>water AND labor pain                                                                                                                   | 2 for 2 trials           |
|                             | Advanced interface:<br>Conditions: labor pain<br>Interventions: water                                                      | 3                                 | Advanced search interface:<br>Condition: labor pain<br>Intervention: water                                                                                           | 3 for 3 trials           |
| Precise strategy            | Basic search interface:<br>sterile water                                                                                   | 185                               | Standard search interface:<br>sterile water                                                                                                                          | 57 for 54 trials         |
|                             | Advanced interface:<br>Interventions: sterile water                                                                        | 162                               | Advanced search interface:<br>Intervention: sterile water                                                                                                            | 58 for 52 trials         |
| Sensitive strategy          | Basic interface:<br>(subcutaneous OR intracutaneous OR water) AND (labor pain OR labor analgesic)                          | 46                                | Standard search interface:<br>subcutaneous AND labor AND pain OR intracutaneous AND labor AND analgesic OR water AND labor AND pain OR water AND labor AND analgesic | 9 for 9 trials           |
|                             | Advanced interface:<br>Conditions: labor pain OR labor analgesic<br>Interventions: subcutaneous OR intracutaneous OR water | 3                                 | Advanced search interface:<br>Condition: labor pain OR labor analgesic<br>Intervention: subcutaneous OR intracutaneous OR water                                      | 96 for 93 trials         |
| Highly sensitive strategy   | Basic interface:<br>(subcutaneous injection OR intracutaneous injection OR sterile water)                                  | 2,114                             | Standard search interface:<br>subcutaneous injection OR intracutaneous injection OR sterile water                                                                    | 339 for 302 trials       |
|                             | Advanced interface:<br>Interventions: (subcutaneous injection OR intracutaneous injection OR sterile water)                | 1,715                             | Advanced Search interface:<br>Intervention: subcutaneous injection OR intracutaneous injection OR sterile water                                                      | 25,070 for 22,735 trials |

\* There were no included studies to be retrieved.

**Duan [13]**

Searches in ClinicalTrials.gov and ICTRP

| <b>Search strategy type</b> | <b>Search strategy in ClinicalTrials.gov</b>                                                                                                             | <b>ClinicalTrials.gov results</b> | <b>ICTRP Search strategy</b>                                                                                                                                                                                                           | <b>ICTRP results</b>     |
|-----------------------------|----------------------------------------------------------------------------------------------------------------------------------------------------------|-----------------------------------|----------------------------------------------------------------------------------------------------------------------------------------------------------------------------------------------------------------------------------------|--------------------------|
| Original search strategy    | (tibial shaft fracture) AND (nail OR fixator OR pin OR screw OR plate OR prostheses OR ream OR unreamed)                                                 |                                   | (tibial shaft fracture) AND (nail OR fixator OR pin OR screw OR plate OR prostheses OR ream OR unreamed)                                                                                                                               |                          |
| Highly precise strategy     | Basic interface:<br>tibial shaft fracture AND nail                                                                                                       | 7 (1+0)                           | Standard interface:<br>tibial shaft fracture* AND nail*                                                                                                                                                                                | 3 for 2 trials (1+0)     |
|                             | Advanced interface:<br>Conditions: tibial shaft fracture<br>Interventions: nail                                                                          | 4 (1+0)                           | Advanced interface:<br>Condition: tibial shaft fracture<br>Intervention: nail                                                                                                                                                          | 1 for 1 trial (0+0)      |
| Precise strategy            | Basic interface:<br>tibial shaft fracture                                                                                                                | 12 (1+0)                          | Standard interface:<br>tibial shaft fracture*                                                                                                                                                                                          | 17 for 9 trials (1 +0)   |
|                             | Advanced interface:<br>Interventions: tibial shaft fracture                                                                                              | 7 (1+0)                           | Advanced interface:<br>Intervention: tibial shaft fracture                                                                                                                                                                             | 7 for 5 trials (0+0)     |
| Sensitive strategy          | Basic search interface:<br>(tibia OR tibial) AND (pin OR nail OR screw OR plate OR fixator OR prostheses OR reamed OR unreamed)                          | 65 (1+1)                          | Standard search interface:<br>tibia* AND nail* OR tibia* AND pin* OR tibia* AND screw* OR tibia* AND plate* OR tibia* AND fix* OR tibia* AND prosthes* OR tibia* AND ream* OR tibia* AND unreamed                                      | 93 for 75 trials (1+1)   |
|                             | Advanced search interface:<br>Conditions: tibia OR tibial<br>Interventions: pin OR nail OR screw OR plate OR fixator OR prostheses OR reamed OR unreamed | 32 (1+1)                          | Advanced search interface:<br>Condition: tibia OR tibial<br>Intervention: pin OR nail OR screw OR plate OR fixator OR prostheses OR reamed OR unreamed                                                                                 | 16 for 14 trials (1+0)   |
| Highly sensitive strategy   | Basic search interface:<br>(fracture OR bone) AND (pin OR nail OR screw OR plate OR fixator OR prostheses OR reamed OR unreamed)                         | 421 (1+1)                         | Standard search interface:<br>fracture* AND nail* OR fracture* AND pin* OR fracture* AND screw* OR fracture* AND plate* OR fracture* AND fix* OR fracture* AND prosthes* OR fracture* AND ream* OR fracture* AND unreamed OR bone* AND | 488 for 417 trials (1+1) |



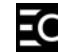

| Search strategy type | Search strategy in ClinicalTrials.gov                                                                                                              | ClinicalTrials.gov results | ICTRP Search strategy                                                                                                                                                                                                                                                                                                                                                                                                                                                     | ICTRP results                                                      |
|----------------------|----------------------------------------------------------------------------------------------------------------------------------------------------|----------------------------|---------------------------------------------------------------------------------------------------------------------------------------------------------------------------------------------------------------------------------------------------------------------------------------------------------------------------------------------------------------------------------------------------------------------------------------------------------------------------|--------------------------------------------------------------------|
|                      | Advanced search interface:<br>Interventions: (fracture OR bone) AND (pin OR nail OR screw OR plate OR fixator OR prostheses OR reamed OR unreamed) | 219 (1+0)                  | nail* OR bone* AND pin* OR bone* AND screw* OR bone* AND plate* OR bone* AND fix* OR bone* AND prosthes* OR bone* AND ream* OR bone* AND unreamed<br>Advanced Search interface:<br>Intervention: fracture nail OR fracture pin OR fracture screw OR fracture plate OR fracture fixator OR fracture prostheses OR fracture ream OR fracture unreamed OR bone nail OR bone pin OR bone screw OR bone plate OR bone fixator OR bone prostheses OR bone ream OR bone unreamed | * This search strategy would not run in the advanced search option |

**Gluud [14]**

Searches in ClinicalTrials.gov and ICTRP\*

| <b>Search strategy type</b> | <b>Search strategy in ClinicalTrials.gov</b>                                                                                                                                                                                                                                            | <b>ClinicalTrials.gov results</b> | <b>ICTRP Search strategy</b>                                                                                                                                                                                                                                                          | <b>ICTRP results</b> |
|-----------------------------|-----------------------------------------------------------------------------------------------------------------------------------------------------------------------------------------------------------------------------------------------------------------------------------------|-----------------------------------|---------------------------------------------------------------------------------------------------------------------------------------------------------------------------------------------------------------------------------------------------------------------------------------|----------------------|
| Original search strategy    | (gastrointestinal bleeding OR esophageal bleeding OR stomach bleeding OR gastric bleeding OR ventricular bleeding OR duodenum bleeding) AND tranexamic                                                                                                                                  |                                   | (gastrointestinal bleeding OR esophageal bleeding OR stomach bleeding OR gastric bleeding OR ventricular bleeding OR duodenum bleeding) AND tranexamic                                                                                                                                |                      |
| Highly precise strategy     | Basic search interface:<br>gastrointestinal bleeding AND tranexamic                                                                                                                                                                                                                     | 1                                 | Standard search interface:<br>gastrointestinal bleed* AND tranexamic                                                                                                                                                                                                                  | 2 for 2 trials       |
|                             | Advanced search interface:<br>Conditions: gastrointestinal bleed<br>Interventions: tranexamic                                                                                                                                                                                           | 1                                 | Advanced search interface:<br>Condition: gastrointestinal bleed<br>Intervention: tranexamic                                                                                                                                                                                           | 1 for 1 trial        |
| Precise strategy            | Basic search interface:<br>Tranexamic                                                                                                                                                                                                                                                   | 77                                | Standard search interface:<br>Tranexamic                                                                                                                                                                                                                                              | 130 for 111 trials   |
|                             | Advanced search:<br>Interventions: tranexamic                                                                                                                                                                                                                                           | 76                                | Advanced search:<br>Intervention: tranexamic                                                                                                                                                                                                                                          | 110 for 96 trials    |
| Sensitive strategy          | Basic search interface:<br>(gastrointestinal OR esophageal OR stomach OR gastric OR ventricular OR duodenum) AND (tranexamic OR lysteda OR cyklokapron OR transamin OR espercil OR femstrual OR kabi 2161 OR amchafibrin OR ugurol OR exacyl OR anvitoff OR spotof OR amcha)            | 1                                 | Standard search interface:<br>gastrointestin* AND tranexamic OR esophag* AND tranexamic OR stomach AND tranexamic OR gastric AND tranexamic OR ventricular AND tranexamic OR duodenum AND tranexamic                                                                                  | 3 for 3 trials       |
|                             | Advanced search interface:<br>Conditions: gastrointestinal OR esophageal OR stomach OR gastric OR ventricular OR duodenum<br>Interventions: tranexamic OR lysteda OR cyklokapron OR transamin OR transcam OR espercil OR cyclocapron OR femstrual OR kabi 2161 OR amchafibrin OR ugurol | 1                                 | Advanced search interface:<br>Condition: gastrointestinal OR esophageal OR stomach OR gastric OR ventricular OR duodenum<br>Intervention: tranexamic OR lysteda OR cyklokapron OR transamin OR transcam OR espercil OR cyclocapron OR femstrual OR kabi 2161 OR amchafibrin OR ugurol | 2 for 2 trials       |



|                           |                                                                                                                                                                                                                                   |    |                                                                                                                                                                                                                                  |                    |
|---------------------------|-----------------------------------------------------------------------------------------------------------------------------------------------------------------------------------------------------------------------------------|----|----------------------------------------------------------------------------------------------------------------------------------------------------------------------------------------------------------------------------------|--------------------|
|                           | OR exacyl OR anvitoff OR spotof OR amcha                                                                                                                                                                                          |    | exacyl OR anvitoff OR spotof OR amcha                                                                                                                                                                                            |                    |
| Highly sensitive strategy | Basic search interface:<br>tranexamic OR lysteda OR cyklokapron OR transamin OR transcam OR espercil OR cyclocapron OR femstrual OR kabi 2161 OR amchafibrin OR ugurol OR exacyl OR anvitoff OR spotof OR amcha                   | 77 | Standard search interface:<br>tranexamic OR lysteda OR cyklokapron OR transamin OR transcam OR espercil OR cyclocapron OR femstrual OR kabi 2161 OR amchafibrin OR ugurol OR exacyl OR anvitoff OR spotof OR amcha               | 138 for 118 trials |
|                           | Advanced search interface:<br>Interventions: tranexamic OR lysteda OR cyklokapron OR transamin OR transcam OR espercil OR cyclocapron OR femstrual OR kabi 2161 OR amchafibrin OR ugurol OR exacyl OR anvitoff OR spotof OR amcha | 76 | Advanced search interface:<br>Intervention: tranexamic OR lysteda OR cyklokapron OR transamin OR transcam OR espercil OR cyclocapron OR femstrual OR kabi 2161 OR amchafibrin OR ugurol OR exacyl OR anvitoff OR spotof OR amcha | 134 for 117 trials |

---

\* There were no included studies to be retrieved.

**Jones [15]**

Searches in ClinicalTrials.gov and ICTRP

| <b>Search strategy type</b> | <b>Search strategy in ClinicalTrials.gov</b>                                                                                                              | <b>ClinicalTrials.gov results</b> | <b>ICTRP Search strategy</b>                                                                                                                                                                                                                                                                                                                                                                                                                                                 | <b>ICTRP results</b>          |
|-----------------------------|-----------------------------------------------------------------------------------------------------------------------------------------------------------|-----------------------------------|------------------------------------------------------------------------------------------------------------------------------------------------------------------------------------------------------------------------------------------------------------------------------------------------------------------------------------------------------------------------------------------------------------------------------------------------------------------------------|-------------------------------|
| Original search strategy    | Intravesical AND Gemcitabine AND Bladder<br>(This is the search strategy used by the review team to search ICTRP)                                         |                                   | Intravesical AND Gemcitabine AND Bladder<br>(This is the search strategy used by the review team to search ICTRP)                                                                                                                                                                                                                                                                                                                                                            |                               |
| Highly precise strategy     | Basic search:<br>Intravesical AND Gemcitabine AND Bladder                                                                                                 | 11 (2)                            | Standard search:<br>intraves* AND gemcitabin* AND bladder                                                                                                                                                                                                                                                                                                                                                                                                                    | 9 for 9 trials<br>(1)         |
|                             | Advanced search:<br>Conditions: bladder<br>Interventions: Intravesical gemcitabine                                                                        | 9 (1)                             | Advanced search:<br>Condition: bladder<br>Intervention: intravesical AND gemcitabine                                                                                                                                                                                                                                                                                                                                                                                         | 2 records for<br>2 trials (0) |
| Precise strategy            | Basic search:<br>gemcitabine AND bladder                                                                                                                  | 99 (2)                            | Standard search:<br>gemcitabin* AND bladder                                                                                                                                                                                                                                                                                                                                                                                                                                  | 116 for 100<br>trials (2)     |
|                             | Advanced search:<br>Conditions: bladder<br>Interventions: gemcitabine                                                                                     | 92 (2)                            | Advanced search:<br>Condition: bladder<br>Intervention: gemcitabine                                                                                                                                                                                                                                                                                                                                                                                                          | 120 for 116<br>trials (2)     |
| Sensitive strategy          | Basic search:<br>(gemcitabine OR gemcitabina OR gemzar OR gemcite) AND (bladder OR urethra OR ureter OR urinary OR urothelial OR renal pelvis OR calices) | 110 (2)                           | Standard search:<br>gemcitabin* AND bladder OR gemzar AND bladder OR gemcite AND bladder OR gemcitabin* AND ureth* OR gemzar AND ureth* OR gemcite AND ureth* OR gemcitabin* AND urin* OR gemzar AND urin* OR gemcite AND urin* OR gemcitabin* AND urotheli* OR gemzar AND urotheli* OR gemcite AND urotheli* OR gemcitabin* AND calice* OR gemzar AND calice* OR gemcite AND calice* OR gemcitabin* AND renal pelvis OR gemzar AND renal pelvis OR gemcite AND renal pelvis | 155 for 128<br>trials (2)     |

| <b>Search strategy type</b> | <b>Search strategy in ClinicalTrials.gov</b>                                                                                                                                                | <b>ClinicalTrials.gov results</b> | <b>ICTRP Search strategy</b>                                                                                                                                                              | <b>ICTRP results</b>                                       |
|-----------------------------|---------------------------------------------------------------------------------------------------------------------------------------------------------------------------------------------|-----------------------------------|-------------------------------------------------------------------------------------------------------------------------------------------------------------------------------------------|------------------------------------------------------------|
|                             | Advanced search:<br>Conditions: bladder OR urethra OR ureter<br>OR urinary OR urothelial OR renal pelvis<br>OR calices<br>Interventions: gemcitabine OR gemcitabina<br>OR gemzar OR gemcite | 99 (2)                            | Advanced search:<br>Condition: bladder OR urethra OR ureter OR<br>urinary OR urothelial OR renal pelvis OR<br>calices<br>Intervention: gemcitabine OR gemcitabina<br>OR gemzar OR gemcite | 154 for 150<br>trials (2)                                  |
| Highly sensitive strategy   | Basic search:<br>gemcitabine OR gemcitabina OR gemzar<br>OR gemcite NOTE 1<br>Advanced search:<br>Interventions: gemcitabine OR gemcitabina<br>OR gemzar OR gemcite                         | 1,336<br><br>1,298                | Standard search:<br>gemcitabin* OR gemzar OR gemcite<br>NOTE 2<br>Advanced Search:<br>Intervention: gemcitabine OR gemcitabina<br>OR gemzar OR gemcite                                    | 2,082 for<br>1,674 trials<br><br>1,558 for<br>1,444 trials |

NOTE 1: Gemcitabine is used as an intervention for numerous cancerous conditions other than bladder cancer: non-small cell lung, pancreatic, and breast. Searching in the basic search interface for (gemcitabine OR gemcitabina OR gemzar OR gemcite) AND (intravesical OR instillation) retrieves 11 records (including both included registered studies). Searching in the advanced search interface for (gemcitabine OR gemcitabina OR gemzar OR gemcite) AND (intravesical OR instillation) retrieves 10 records, including the 2 included registered studies.

NOTE 2: \* Including "intraves\*" in the search strategy reduces the results to 11 records for 11 trials (i.e., gemcitabin\* AND intraves\* OR gemzar AND intraves\* OR gemcite AND intraves\* OR gemcitabin\* AND instill\* OR gemzar AND instill\* OR gemcite AND instill\*). This search identifies the 2 included registered studies.

**Langendam [16]**

Searches in ClinicalTrials.gov and ICTRP

| <b>Search strategy type</b> | <b>Search strategy in ClinicalTrials.gov</b>                                                                                                                                                                                                                                   | <b>ClinicalTrials.gov Results</b> | <b>ICTRP Search strategy</b>                                                                                                                                                                                                                                                                                                                                        | <b>ICTRP results</b>    |
|-----------------------------|--------------------------------------------------------------------------------------------------------------------------------------------------------------------------------------------------------------------------------------------------------------------------------|-----------------------------------|---------------------------------------------------------------------------------------------------------------------------------------------------------------------------------------------------------------------------------------------------------------------------------------------------------------------------------------------------------------------|-------------------------|
| Original search strategy    | Diabetes 1 AND Continuous glucose monitoring AND RCT filter/systematic review filter                                                                                                                                                                                           |                                   | Diabetes 1 AND Continuous glucose monitoring AND RCT filter/systematic review filter                                                                                                                                                                                                                                                                                |                         |
| Highly precise strategy     | Basic search:<br>diabetes 1 AND glucose monitoring                                                                                                                                                                                                                             | 436 (7)                           | Standard search:<br>diabetes 1 AND glucose monitor*                                                                                                                                                                                                                                                                                                                 | 184 for 181 trials (9)  |
|                             | Advanced search:<br>Conditions: diabetes 1<br>Interventions: glucose monitoring                                                                                                                                                                                                | 117 (7)                           | Advanced search:<br>Condition: diabetes<br>Intervention: glucose monitoring                                                                                                                                                                                                                                                                                         | 68 for 68 trials (4)    |
| Precise strategy            | We decided that it would be inefficient to search for diabetes alone, and “glucose monitoring” as a single search would actually be sensitive rather than precise.                                                                                                             | N/A                               | We decided that it would be inefficient to search for diabetes alone and “glucose monitoring” as a single search would actually be sensitive rather than precise.                                                                                                                                                                                                   | N/A                     |
| Sensitive strategy          | Basic search:<br>(“glucose monitor” OR “glucose monitoring” OR “glucose sensor” OR glucowatch OR medtronic OR glucosemeter) AND (diabetes OR “insulin dependent” OR ketoacidosis)                                                                                              | 360 (8)                           | Standard search:<br>glucose monitor* AND diabetes OR glucose sensor* AND diabetes OR glucowatch AND diabetes OR medtronic AND diabetes OR glucosemeter AND diabetes OR glucose monitor* AND insulin dependent OR glucose sensor* AND insulin dependent OR glucowatch AND insulin dependent OR medtronic AND insulin dependent OR glucosemeter AND insulin dependent | 225 for 217 trials (12) |
|                             | Advanced search:<br>Conditions: “diabetes 1” OR “diabetes type 1” OR “diabetes I” OR “diabetes type I” OR “diabetes one” OR “diabetes type one” OR “type 1 diabetes” OR “type I diabetes” OR “type one diabetes” OR “insulin dependent” OR “juvenile diabetes” OR ketoacidosis | 131 (7)                           | Advanced search:<br>Condition: diabetes OR insulin dependent OR ketoacidosis<br>Intervention: glucose monitor OR glucose monitoring OR glucose sensor OR glucowatch OR medtronic OR glucosemeter                                                                                                                                                                    | 525 for 480 trials (9)  |

| <b>Search strategy type</b> | <b>Search strategy in ClinicalTrials.gov</b>                                                                                  | <b>ClinicalTrials.gov Results</b> | <b>ICTRP Search strategy</b>                                                                                                         | <b>ICTRP results</b>        |
|-----------------------------|-------------------------------------------------------------------------------------------------------------------------------|-----------------------------------|--------------------------------------------------------------------------------------------------------------------------------------|-----------------------------|
|                             | Interventions: (glucose AND (monitor OR monitoring OR sensor)) OR glucoWatch OR medtronic OR glucosemeter                     |                                   |                                                                                                                                      |                             |
| Highly sensitive strategy   | Basic search:<br>(glucose AND (monitor OR monitoring OR sensor)) OR glucoWatch OR medtronic OR glucosemeter                   | 1,522 (8)                         | Standard search:<br>glucose monitor* OR glucose sensor* OR glucoWatch OR medtronic OR glucosemeter                                   | 688 for 657 trials (12)     |
|                             | Advanced search:<br>Interventions: (glucose AND (monitor OR monitoring OR sensor)) OR glucoWatch OR medtronic OR glucosemeter | 573 (8)                           | Advanced search:<br>Intervention: glucose monitor OR glucose monitoring OR glucose sensor OR glucoWatch OR medtronic OR glucosemeter | 1,776 for 1,667 trials (12) |
